# Supplementary material for: IL-2 secretion-based sorting of single T cells using high-throughput microfluidic on-cell cytokine capture
Source: Royal Society of Chemistry journal article supplement (doi:10.1039/d1lc01098k), 2022-01-01
Supplement: d1lc01098k1.pdf [file d1lc01098k1.pdf]

### Supporting Figures

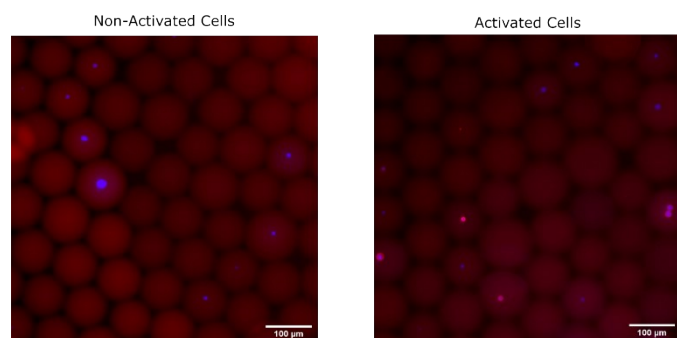

**Figure S1.** Fluorescence Images of droplets containing T cells and reagents for the on-cell sandwich assay. Non-activated cells show no on cell red IL-2 signal, and a diffuse red fluorescent signal in droplets. Activated cells show punctate red fluorescent signal on cell surfaces for a fraction of secreting cells.
